# Supplementary material
Source: MDPI journal article supplement (https://www.mdpi.com/1099-4300/24/7/873)
Supplement: s1 [file s1]

## Supplementary

Table S1 shows the results of EGFAFS with different sizes of subsets. Specifically, the size of the feature subsets is set to 30, 50, 100, and 150.

**Table S1. Comparison of EGFAFS with different sizes of subsets**

| Dataset | size | ACC           | F1            | Recall        | PRE           | MCC           | AP            | AUC           |
|---------|------|---------------|---------------|---------------|---------------|---------------|---------------|---------------|
| HNSC    | 30   | <b>1.0000</b> |
|         | 50   | 0.9909        | 0.9090        | 0.8333        | <b>1.0000</b> | 0.9085        | <b>1.0000</b> | <b>1.0000</b> |
|         | 100  | <b>1.0000</b> |
|         | 150  | 0.9909        | 0.9090        | 0.8333        | <b>1.0000</b> | 0.9085        | 0.9583        | 0.9967        |
| LIHC    | 30   | <b>0.9882</b> | <b>0.9600</b> | <b>1.0000</b> | <b>0.9230</b> | <b>0.9541</b> | 0.9935        | 0.9988        |
|         | 50   | <b>0.9882</b> | <b>0.9600</b> | <b>1.0000</b> | <b>0.9230</b> | <b>0.9541</b> | <b>1.0000</b> | <b>1.0000</b> |
|         | 100  | 0.9629        | 0.8571        | <b>1.0000</b> | 0.7500        | 0.8477        | <b>1.0000</b> | <b>1.0000</b> |
|         | 150  | 0.9764        | 0.9166        | 0.9166        | 0.9166        | 0.9029        | 0.9790        | 0.9965        |
| LUAD    | 30   | 0.9826        | 0.9166        | 0.8461        | <b>1.0000</b> | 0.9999        | <b>1.0000</b> | <b>1.0000</b> |
|         | 50   | <b>1.0000</b> | <b>1.0000</b> | <b>1.0000</b> | <b>1.0000</b> | <b>1.0000</b> | 0.9999        | <b>1.0000</b> |
|         | 100  | <b>1.0000</b> |
|         | 150  | <b>1.0000</b> |
| LUSC    | 30   | <b>1.0000</b> |
|         | 50   | <b>1.0000</b> |
|         | 100  | 0.9859        | 0.8000        | <b>1.0000</b> | 0.6666        | 0.8105        | <b>1.0000</b> | <b>1.0000</b> |
|         | 150  | <b>1.0000</b> |
| PRAD    | 30   | 0.9727        | 0.8235        | <b>0.8750</b> | 0.7777        | 0.8104        | 0.9149        | 0.9865        |
|         | 50   | <b>0.9909</b> | <b>0.9333</b> | <b>0.8750</b> | <b>1.0000</b> | <b>0.9308</b> | 0.9416        | 0.9914        |
|         | 100  | 0.9428        | 0.7142        | 0.7142        | 0.7142        | 0.6825        | 0.7382        | 0.9455        |
|         | 150  | 0.9818        | 0.8750        | <b>0.8750</b> | 0.8750        | 0.8651        | <b>0.9464</b> | <b>0.9926</b> |
| STAD    | 30   | 0.9756        | 0.8000        | 0.6666        | <b>1.0000</b> | 0.8059        | 0.7916        | 0.9583        |
|         | 50   | 0.9634        | 0.6666        | 0.5000        | <b>1.0000</b> | 0.6935        | 0.8854        | 0.9817        |
|         | 100  | <b>0.9878</b> | <b>0.9090</b> | <b>0.8333</b> | <b>1.0000</b> | <b>1.0000</b> | <b>0.9069</b> | 0.9444        |
|         | 150  | 0.9538        | 0.7272        | 0.6666        | 0.8000        | 0.7057        | 0.8773        | <b>0.9858</b> |
| THCA    | 30   | <b>1.0000</b> |
|         | 50   | <b>1.0000</b> |
|         | 100  | 0.9912        | 0.9600        | 0.9230        | <b>1.0000</b> | 0.9560        | <b>1.0000</b> | <b>1.0000</b> |
|         | 150  | 0.9780        | 0.8888        | 0.8888        | 0.8888        | 0.8766        | 0.9888        | 0.9986        |
| UCEC    | 30   | 0.9913        | 0.9333        | 0.8750        | <b>1.0000</b> | 0.9311        | <b>1.0000</b> | <b>1.0000</b> |
|         | 50   | <b>1.0000</b> |
|         | 100  | 0.9913        | 0.9411        | <b>1.0000</b> | 0.8888        | 0.9384        | <b>1.0000</b> | <b>1.0000</b> |
|         | 150  | 0.9913        | 0.9333        | 0.8750        | <b>1.0000</b> | 0.9311        | <b>1.0000</b> | <b>1.0000</b> |

Table S2 shows the results of EGFAFS with different sizes of the feature recommended pool. Specifically, the size of the feature recommended pool is set to 100, 300, and 500, respectively.

**Table S2. Comparison of the performance with different sizes of the feature recommended pool**

| Dataset | size | ACC           | F1            | Recall        | PRE           | MCC           | AP            | AUC           |
|---------|------|---------------|---------------|---------------|---------------|---------------|---------------|---------------|
| HNSC    | 100  | 0.9636        | 0.6666        | 0.6666        | 0.6666        | 0.6474        | 0.8333        | 0.9727        |
|         | 300  | <b>0.9909</b> | <b>0.9090</b> | 0.8333        | <b>1.0000</b> | <b>0.9085</b> | <b>1.0000</b> | <b>1.0000</b> |
|         | 500  | 0.9818        | 0.8333        | <b>0.8333</b> | 0.8333        | 0.8333        | 0.9761        | 0.9983        |
| LIHC    | 100  | 0.9764        | 0.9166        | 0.9166        | 0.9166        | 0.9029        | 0.9935        | 0.9988        |
|         | 300  | <b>0.9882</b> | <b>0.9600</b> | <b>1.0000</b> | <b>0.9230</b> | <b>0.9541</b> | <b>1.0000</b> | <b>1.0000</b> |
|         | 500  | 0.9647        | 0.8799        | 0.9166        | 0.8461        | 0.8602        | 0.8461        | 0.8602        |
| LUAD    | 100  | <b>1.0000</b> | <b>1.0000</b> | <b>1.0000</b> | <b>1.0000</b> | <b>1.0000</b> | <b>0.9999</b> | <b>1.0000</b> |
|         | 300  | <b>1.0000</b> | <b>1.0000</b> | <b>1.0000</b> | <b>1.0000</b> | <b>1.0000</b> | <b>0.9999</b> | <b>1.0000</b> |
|         | 500  | 0.9826        | 0.9166        | 0.8461        | <b>1.0000</b> | 0.9109        | 0.9945        | 0.9992        |
| LUSC    | 100  | <b>1.0000</b> |
|         | 300  | <b>1.0000</b> |
|         | 500  | <b>1.0000</b> |
| PRAD    | 100  | 0.9636        | 0.75          | 0.75          | 0.75          | 0.7303        | 0.7940        | 0.9718        |
|         | 300  | <b>0.9909</b> | <b>0.9333</b> | <b>0.8750</b> | <b>1.0000</b> | <b>0.9308</b> | <b>0.9416</b> | <b>0.9914</b> |
|         | 500  | 0.9545        | 0.6666        | 0.625         | 0.7142        | 0.6440        | 0.8588        | 0.9803        |
| STAD    | 100  | 0.9512        | 0.6           | 0.5           | 0.75          | 0.5885        | 0.9334        | 0.9916        |
|         | 300  | 0.9634        | 0.6666        | 0.5000        | <b>1.0000</b> | 0.6935        | 0.8854        | 0.9817        |
|         | 500  | <b>0.9878</b> | <b>0.9090</b> | <b>0.8333</b> | <b>1.0000</b> | <b>0.9069</b> | <b>1.0000</b> | <b>1.0000</b> |
| THCA    | 100  | <b>1.0000</b> |
|         | 300  | <b>1.0000</b> |
|         | 500  | 0.9561        | 0.8275        | 0.9230        | 0.75          | 0.8084        | 0.9334        | 0.9916        |
| UCEC    | 100  | 0.9913        | 0.9333        | 0.875         | <b>1.0000</b> | 0.9311        | 0.9861        | 0.9861        |
|         | 300  | <b>1.0000</b> |
|         | 500  | 0.9827        | 0.8571        | 0.75          | <b>1.0000</b> | 0.8581        | <b>1.0000</b> | <b>1.0000</b> |

Table S3-S10 represent the detailed information of comparison results of our EGFAFS and eight well-known FS methods (GA, PSO, SA, DE, EGSG, Boruta, HSICLasso, and DNN-FS) on eight gene expression datasets (HNSC, LIHC, LUAD, LUSC, PRAD, STAD, THCA, and UCEC).

**Table S3.** Comparison of different methods on HNSC

| Method    | ACC           | F1            | Recall        | PREF          | MCC           | AP            | AUC           |
|-----------|---------------|---------------|---------------|---------------|---------------|---------------|---------------|
| GA        | 0.9818        | 0.8333        | <b>0.8333</b> | 0.8333        | 0.8237        | 0.9761        | 0.9983        |
| PSO       | 0.9818        | 0.8333        | <b>0.8333</b> | 0.8333        | 0.8237        | 0.9305        | 0.9951        |
| SA        | 0.9736        | 0.8695        | 0.7692        | <b>1.0000</b> | 0.8643        | 0.9796        | 0.9969        |
| DE        | 0.9818        | 0.8333        | <b>0.8333</b> | 0.8333        | 0.8237        | 0.8972        | 0.9935        |
| EGSG      | 0.9454        | 0.2500        | 0.1666        | 0.5000        | 0.2669        | 0.4039        | 0.9214        |
| Boruta    | 0.9545        | 0.4444        | 0.3333        | 0.6667        | 0.4513        | 0.8357        | 0.9903        |
| HSICLasso | <b>0.9909</b> | <b>0.9090</b> | <b>0.8333</b> | 1.0000        | <b>0.9085</b> | 0.9444        | 0.9951        |
| DNN-FS    | 0.9727        | 0.7272        | 0.6666        | 0.8000        | 0.7163        | 0.8857        | 0.9903        |
| EGFAFS    | <b>0.9909</b> | <b>0.9090</b> | <b>0.8333</b> | <b>1.0000</b> | <b>0.9085</b> | <b>1.0000</b> | <b>1.0000</b> |

**Table S4.** Comparison of different methods on LIHC

| Method    | ACC           | F1            | Recall        | PRE           | MCC           | AP            | AUC           |
|-----------|---------------|---------------|---------------|---------------|---------------|---------------|---------------|
| GA        | 0.9529        | 0.8181        | 0.7500        | 0.9000        | 0.7957        | 0.9537        | 0.9908        |
| PSO       | 0.9647        | 0.8695        | 0.8333        | 0.9090        | 0.8502        | 0.9735        | 0.9954        |
| SA        | 0.9529        | 0.8181        | 0.7500        | 0.9000        | 0.7957        | 0.9437        | 0.9908        |
| DE        | 0.9647        | 0.8799        | 0.9166        | 0.8461        | 0.8602        | 0.9676        | 0.9942        |
| EGSG      | 0.9411        | 0.7368        | 0.5833        | <b>1.0000</b> | 0.7388        | 0.8952        | 0.9691        |
| Boruta    | 0.9647        | 0.8696        | 0.8333        | 0.9090        | 0.8503        | 0.9579        | 0.9579        |
| HSICLasso | 0.9529        | 0.8181        | 0.7500        | 0.9000        | 0.7957        | 0.9614        | 0.9942        |
| DNN-FS    | 0.9764        | 0.9090        | 0.8333        | <b>1.0000</b> | 0.9006        | <b>1.0000</b> | <b>1.0000</b> |
| EGFAFS    | <b>0.9882</b> | <b>0.9600</b> | <b>1.0000</b> | 0.9230        | <b>0.9541</b> | <b>1.0000</b> | <b>1.0000</b> |

**Table S5.** Comparison of different methods on LUAD

| Method    | ACC           | F1            | Recall        | PRE           | MCC           | AP            | AUC           |
|-----------|---------------|---------------|---------------|---------------|---------------|---------------|---------------|
| GA        | 0.9913        | 0.9600        | 0.9230        | <b>1.0000</b> | 0.9560        | <b>0.9999</b> | <b>1.0000</b> |
| PSO       | 0.9913        | 0.9600        | 0.9230        | <b>1.0000</b> | 0.9560        | 0.9945        | 0.9992        |
| SA        | 0.9913        | 0.9600        | 0.9230        | <b>1.0000</b> | 0.9560        | <b>0.9999</b> | <b>1.0000</b> |
| DE        | 0.9913        | 0.9600        | 0.9230        | <b>1.0000</b> | 0.9560        | <b>0.9999</b> | <b>1.0000</b> |
| EGSG      | 0.9304        | 0.5555        | 0.3846        | <b>1.0000</b> | 0.5971        | <b>0.9999</b> | <b>1.0000</b> |
| Boruta    | 0.9913        | 0.9600        | 0.9230        | <b>1.0000</b> | 0.9561        | 0.9945        | 0.9992        |
| HSICLasso | <b>1.0000</b> | <b>1.0000</b> | <b>1.0000</b> | <b>1.0000</b> | <b>1.0000</b> | <b>0.9999</b> | <b>1.0000</b> |
| DNN-FS    | 0.9826        | 0.9166        | 0.8461        | <b>1.0000</b> | 0.9109        | 0.9897        | 0.9984        |
| EGFAFS    | <b>1.0000</b> | <b>1.0000</b> | <b>1.0000</b> | <b>1.0000</b> | <b>1.0000</b> | <b>0.9999</b> | <b>1.0000</b> |

**Table S6.** Comparison of different methods on LUSC

| Method    | ACC           | F1            | Recall        | PRE           | MCC           | AP            | AUC           |
|-----------|---------------|---------------|---------------|---------------|---------------|---------------|---------------|
| GA        | <b>1.0000</b> |
| PSO       | <b>1.0000</b> |
| SA        | <b>1.0000</b> |
| DE        | <b>1.0000</b> |
| EGSG      | 0.9545        | 0.7368        | 0.5833        | <b>1.0000</b> | 0.7449        | 0.9692        | 0.9940        |
| Boruta    | 0.9818        | 0.9091        | 0.8333        | <b>1.0000</b> | 0.9037        | 0.9936        | 0.9991        |
| HSICLasso | <b>1.0000</b> |
| DNN-FS    | <b>1.0000</b> |
| EGFAFS    | <b>1.0000</b> |

**Table S7.** Comparison of different methods on PRAD

| Method    | ACC           | F1            | Recall        | PRE           | MCC           | AP            | AUC           |
|-----------|---------------|---------------|---------------|---------------|---------------|---------------|---------------|
| GA        | 0.9727        | 0.7999        | 0.7500        | 0.8571        | 0.7874        | 0.8638        | 0.9595        |
| PSO       | 0.9727        | 0.7999        | 0.7500        | 0.8571        | 0.7874        | 0.9208        | <b>0.9914</b> |
| SA        | 0.9727        | 0.7999        | 0.7500        | 0.8571        | 0.7874        | 0.9184        | <b>0.9914</b> |
| DE        | 0.9636        | 0.7777        | 0.8750        | 0.7000        | 0.7638        | 0.9144        | <b>0.9901</b> |
| EGSG      | 0.9545        | 0.6153        | 0.5000        | 0.8000        | 0.6111        | 0.6267        | 0.9644        |
| Boruta    | 0.9455        | 0.4000        | 0.2500        | <b>1.0000</b> | 0.4859        | 0.7139        | 0.9228        |
| HSICLasso | 0.9636        | 0.7500        | 0.7500        | 0.7500        | 0.7304        | 0.7939        | 0.9730        |
| DNN-FS    | 0.9636        | 0.7500        | 0.7500        | 0.7500        | 0.7303        | 0.8039        | 0.9362        |
| EGFAFS    | <b>0.9909</b> | <b>0.9333</b> | <b>0.8750</b> | <b>1.0000</b> | <b>0.9308</b> | <b>0.9416</b> | <b>0.9914</b> |

**Table S8.** Comparison of different methods on STAD

| Method    | ACC           | F1            | Recall        | PRE           | MCC           | AP            | AUC           |
|-----------|---------------|---------------|---------------|---------------|---------------|---------------|---------------|
| GA        | 0.9512        | 0.5000        | 0.3333        | <b>1.0000</b> | 0.5627        | 0.8284        | 0.9802        |
| PSO       | <b>0.9634</b> | <b>0.6666</b> | <b>0.5000</b> | <b>1.0000</b> | <b>0.6935</b> | 0.6502        | 0.9232        |
| SA        | <b>0.9634</b> | <b>0.6666</b> | <b>0.5000</b> | <b>1.0000</b> | <b>0.6935</b> | 0.8310        | 0.9714        |
| DE        | <b>0.9634</b> | <b>0.6666</b> | <b>0.5000</b> | <b>1.0000</b> | <b>0.6935</b> | 0.8757        | <b>0.9868</b> |
| EGSG      | 0.9512        | 0.5000        | 0.3333        | <b>1.0000</b> | 0.5627        | 0.6400        | 0.9407        |
| Boruta    | <b>0.9634</b> | <b>0.6666</b> | <b>0.5000</b> | <b>1.0000</b> | <b>0.6935</b> | 0.7973        | 0.9714        |
| HSICLasso | 0.9146        | 0.2222        | 0.1666        | 0.3333        | 0.1946        | 0.6092        | 0.9627        |
| DNN-FS    | 0.9390        | 0.4444        | 0.3333        | 0.6666        | 0.4441        | 0.7098        | 0.9714        |
| EGFAFS    | <b>0.9634</b> | <b>0.6666</b> | <b>0.5000</b> | <b>1.0000</b> | <b>0.6935</b> | <b>0.8854</b> | 0.9817        |

**Table S9.** Comparison of different methods on THCA

[illegible]

Table S10. Comparison of different methods on UCEC

[illegible]

Table S11 shows the distribution of genes found by nine FS methods (GA, SA, PSO, ED, EGSG, Boruta, HSICLasso, DNN-FS, and EGFAFS) on HNSC.

Table S11. The distribution of genes found by nine FS methods on HNSC

| Names                | Total | Genes                                                   |
|----------------------|-------|---------------------------------------------------------|
| DE, EGFAFS, GA       | 1     | KDM1A                                                   |
| DE, EGSG, PSO        | 1     | TNMD                                                    |
| DE, GA, PSO          | 1     | CEACAM1                                                 |
| DE, GA, SA           | 1     | ERFE                                                    |
| DE, PSO, SA          | 1     | WDR53                                                   |
| DE, HSICLasso, SA    | 2     | FMO2, CAB39L                                            |
| EGFAFS, GA, SA       | 1     | TK1                                                     |
| EGSG, HSICLasso, PSO | 1     | ADIPOQ                                                  |
| Boruta, EGFAFS       | 1     | FHOD1                                                   |
| Boruta, EGSG         | 1     | SULT1C3                                                 |
| DE, EGFAFS           | 2     | MORC2, WNT2                                             |
| DE, GA               | 2     | UHRF1, MED30                                            |
| DE, PSO              | 2     | IKBIP, DCBLD1                                           |
| DE, HSICLasso        | 3     | SHCBP1, COBL, BARX2                                     |
| EGFAFS, GA           | 1     | FOXD1                                                   |
| EGFAFS, PSO          | 1     | VASP                                                    |
| EGFAFS, SA           | 5     | NDRG2, COL5A2, P3H1, BMP1, MMP9                         |
| EGFAFS, HSICLasso    | 4     | RRAGD, COLGALT1, FAM3D, ACADL                           |
| EGSG, GA             | 1     | FAM71A                                                  |
| EGSG, PSO            | 1     | C6                                                      |
| EGSG, HSICLasso      | 3     | OTC, KCNC2, SMR3B                                       |
| GA, SA               | 8     | SLC27A6, CBX3, GJC1, UBL3, CCM2, ZNF707, HSD17B6, MMP12 |
| GA, HSICLasso        | 4     | HMGCS2, KRT13, TGM3, PLIN1                              |
| PSO, SA              | 1     | NEU1                                                    |
| HSICLasso            | 3     | EMP1, ADH1B, ATP6V0A4                                   |

|           |    |                                                                                                                                                                                                                                                                                                                                                                                                       |
|-----------|----|-------------------------------------------------------------------------------------------------------------------------------------------------------------------------------------------------------------------------------------------------------------------------------------------------------------------------------------------------------------------------------------------------------|
| SA        |    |                                                                                                                                                                                                                                                                                                                                                                                                       |
| Boruta    | 28 | NANOGP8, HOXB1, WDR24, CASKIN2, TPM4, DGKG, SF3A1, CD5L, CDC42EP2, PPID, FMO4, SLITRK5, C7orf33, OR4A47, APTX, SCT, ADGRG2, ASB6, WDR72, INTS8, EXOSC8, GUF1, CD247, CYP51A1, GLP1R, ZNF558, OR56A4, TP53TG5                                                                                                                                                                                          |
| DE        | 30 | C1orf112, CKS1B, UBE2Z, CEP131, TNFRSF4, SORCS1, HMGB3, BMP8A, SPAG5, RHEBL1, GINS1, HOXC11, COL6A3, CCN4, ITGA6, HOXD10, HOXC4, CFAP251, QARS1, NDC80, GAST, SCG5, HSP90B1, SLC52A2, CLEC3B, EVPL, CAMK2N2, ARTN, CAPN5, SH2D2A                                                                                                                                                                      |
| DNN-FS    | 50 | L3HYPDH, NADK, NMUR1, C1S, ARHGAP32, CCDC110, STXBP2, SMIM12, ZNF208, GPR179, CYB561, SCAMP4, ZNF491, TRAK1, CTSG, KRTAP9-8, NFIB, SH3RF1, VEZT, C10orf71, PGGT1B, SREBF1, DTX3L, SLC18A2, CD300LD, ADGRE2, NR1D2, CEPT1, TLX2, TEPP, C2orf80, APOL1, RAD9A, STARD4, MYC, FERD3L, TMEM217, ANP32B, TM4SF19-DYNLT2B, RAD50, NUDCD1, HRH1, CST5, GABRR1, LCE4A, TNFRSF14, OSBPL9, UBQLN2, AMZ1, ANKRD65 |
| EGFAFS    | 34 | KIF26B, RNASEH2A, FOXD2, CCL11, HOMER3, ZNF114, MTFR2, MINDY1, OCIAD2, ABL2, LOXL2, CCNF, KPNA2, FAM107A, TEDC2, KIF2C, GPX3, DNAH17, ORC6, UBE2C, SMS, COL5A1, PMEPA1, CHST11, TGFB1, RFC4, TTK, PSMC3IP, SOCS1, PKMYT1, B3GAT3, NEK2, ERF, NAT14                                                                                                                                                    |
| EGSG      | 42 | SMR3A, MOGAT1, LIPE, ANGPTL5, HCN1, TMOD4, CABS1, LHCGR, KRTAP1-3, BPIFA2, SLC5A7, NPY2R, SCGN, FIGLA, PABPC1L2A, PCDH20, GSTA5, OPRPN, OTOR, CSN2, ANKRD20A3P, C1orf87, KRTAP3-2, FTMT, CLDN25, LRRTM1, TEX26, FAM47E-STBD1, SPINK8, PPDPFL, CRISP2, WFDC6, PABPC1L2B, AMELY, SCGB1D2, LACRT, KRTAP1-1, MRGPPE, SERTM1, C14orf180, RPRML, FCN2                                                       |
| GA        | 23 | ZFP92, ITGA5, HOXD8, EXT1, EFN1, CERS5, KRT4, ACD, HDGF, ADAMTSL2, CDCA4, C18orf54, OIP5, PLOD3, GGTA1, TPPP2, H2AC11, CENPO, KIF14, NRIP3, CDHR2, HTR1D, ESM1                                                                                                                                                                                                                                        |
| PSO       | 25 | NPY5R, PDE6A, MOGS, SERPINE1, DTL, ALG3, SLC13A2, TCP11L1, CACNB4, BST2, BIRC5, MUCL3, NOX4, CRYBG2, IL36A, IFI30, MTBP, FUCA2, MTHFD1L, FSD1, TPBG, TROAP, SLC26A6, IGSF8, HJURP                                                                                                                                                                                                                     |
| SA        | 28 | QSOX2, TMPRSS11B, BCL2L12, ADAM12, AP2M1, HOXD11, NRM, SERPINH1, PARP12, STX1A, PTK7, CDC25B, NUCB2, MMP14, HOXC8, COL10A1, HOXC9, GRIN2D, MRGBP, HOXD9, IBSP, MFAP2, COL13A1, CFTR, CDCA5, ISG15, PRIM2, MMP11                                                                                                                                                                                       |
| HSICLasso | 30 | PRH2, MYZAP, TPT1, ARSF, TMEM132C, PEBP4, UPK1A, DLG2, ENDOU, DYNAP, KRT36, RORC, CIDEC, NRG2, MT1A, BLOC1S3, GPRIN1, SLC38A3, GPD1, CSRNP1, KRT84, MYOC, SLC38A7, KRT78, ADH4, CRISP3, PLIN5, ZNF200, ATP6V1C1, PAIP2B                                                                                                                                                                               |

Figure S1-S8 show the degrees of the genes (features) selected by EGFAFS in differential co-expression networks for eight datasets (HNSC, LIHC, LUAD, LUSC, PRAD, STAD, THCA, and UCEC).

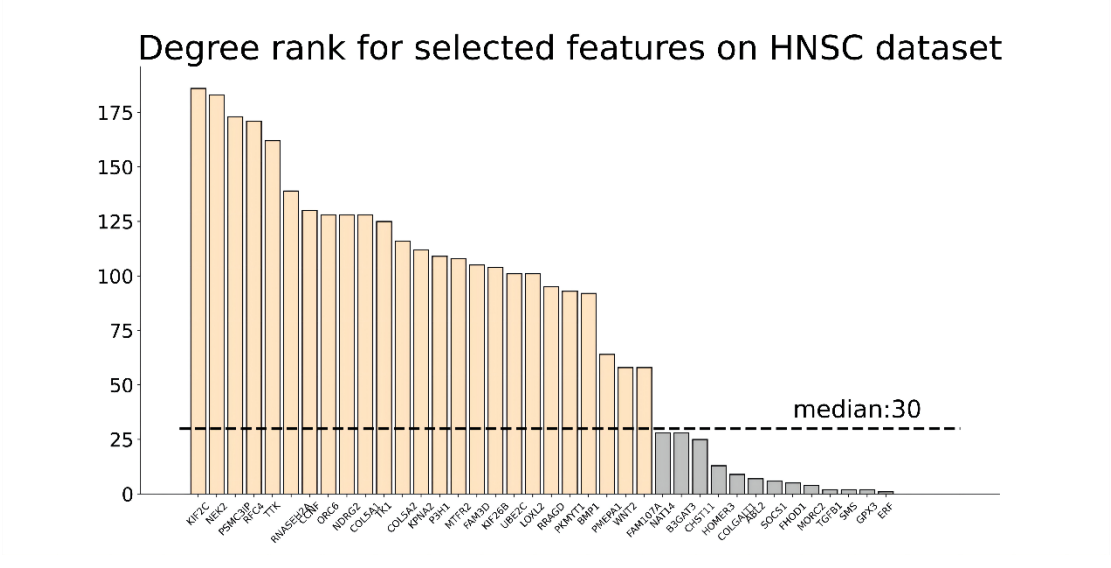

**Figure S1.** The degree of the features selected by EGFAFS for LIHC dataset in the differential co-expression network.

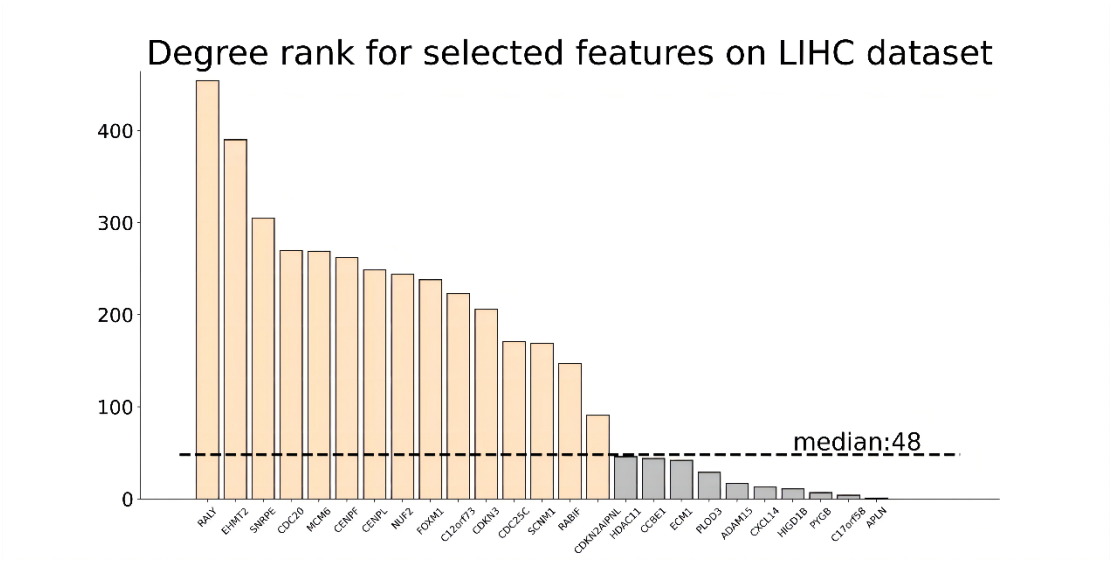

**Figure S2.** The degree of the features selected by EGFAFS for LIHC dataset in the differential co-expression network.

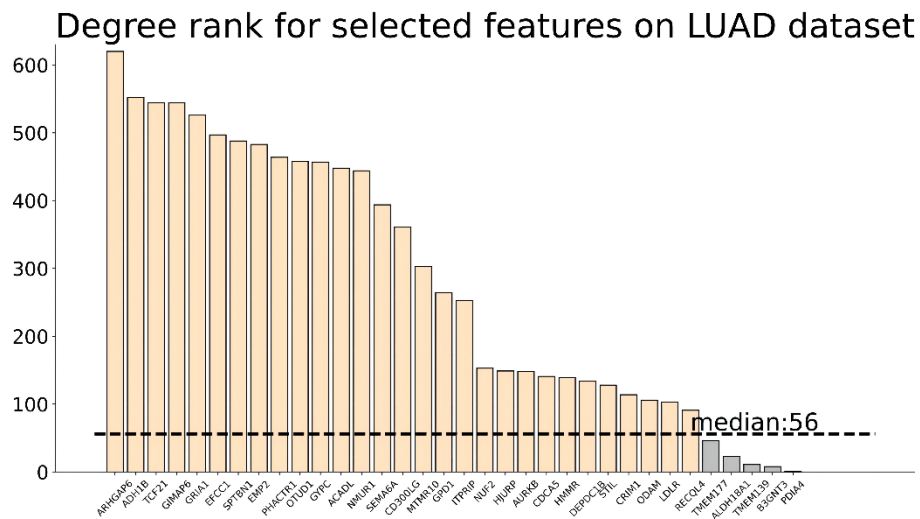

**Figure S3.** The degree of the features selected by EGFAFS for LUAD dataset in the differential co-expression network.

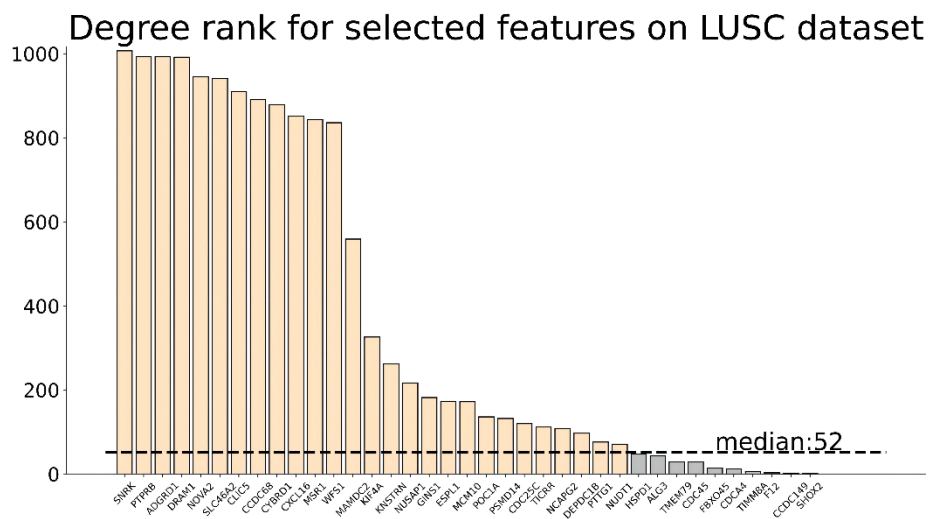

**Figure S4.** The degree of the features selected by EGFAFS for LUSC dataset in the differential co-expression network.

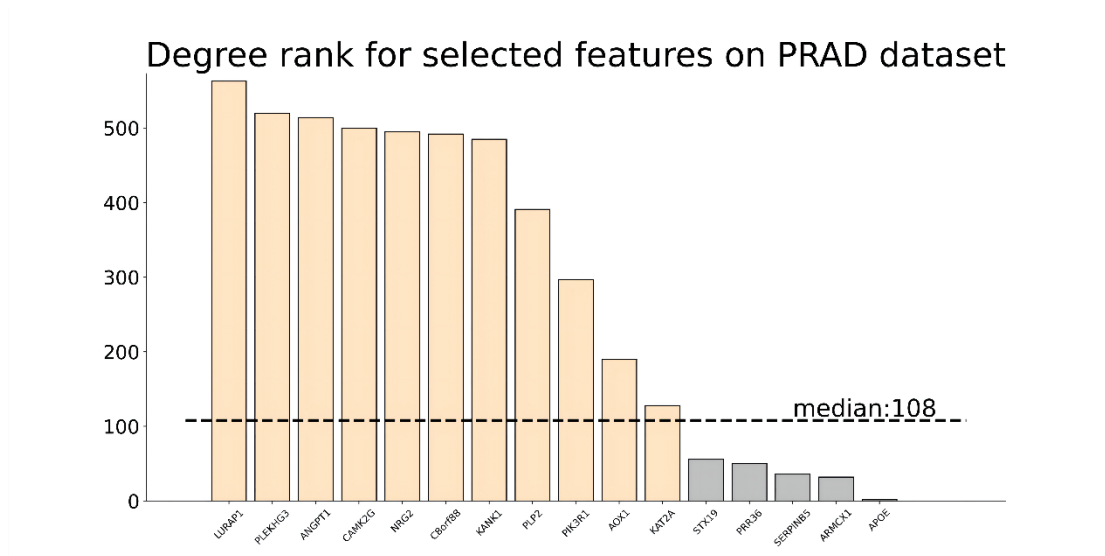

**Figure S5.** The degree of the features selected by EGFAFS for PRAD dataset in the differential co-expression network.

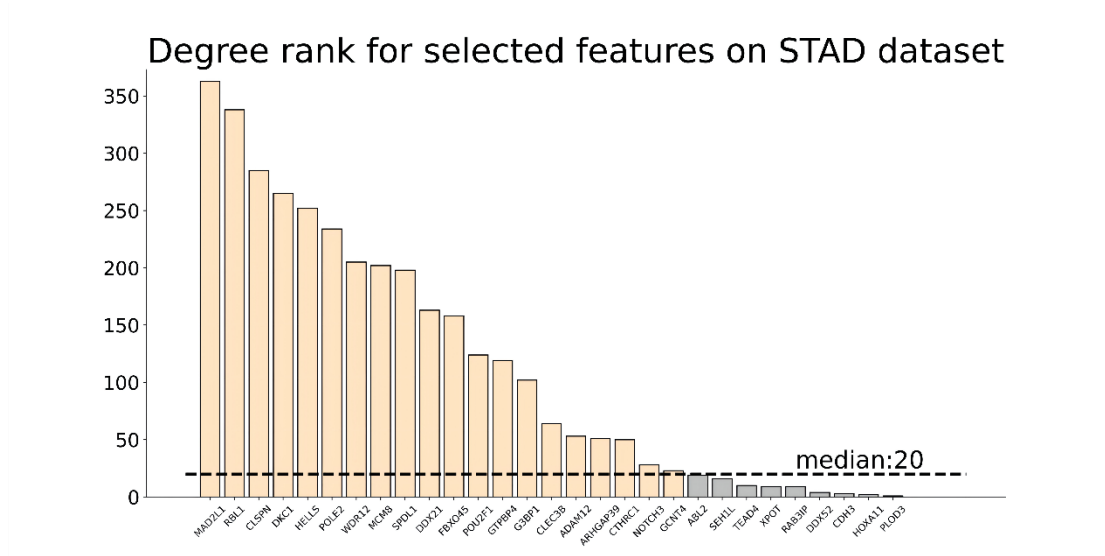

**Figure S6.** The degree of the features selected by EGFAFS for STAD dataset in the differential co-expression network.

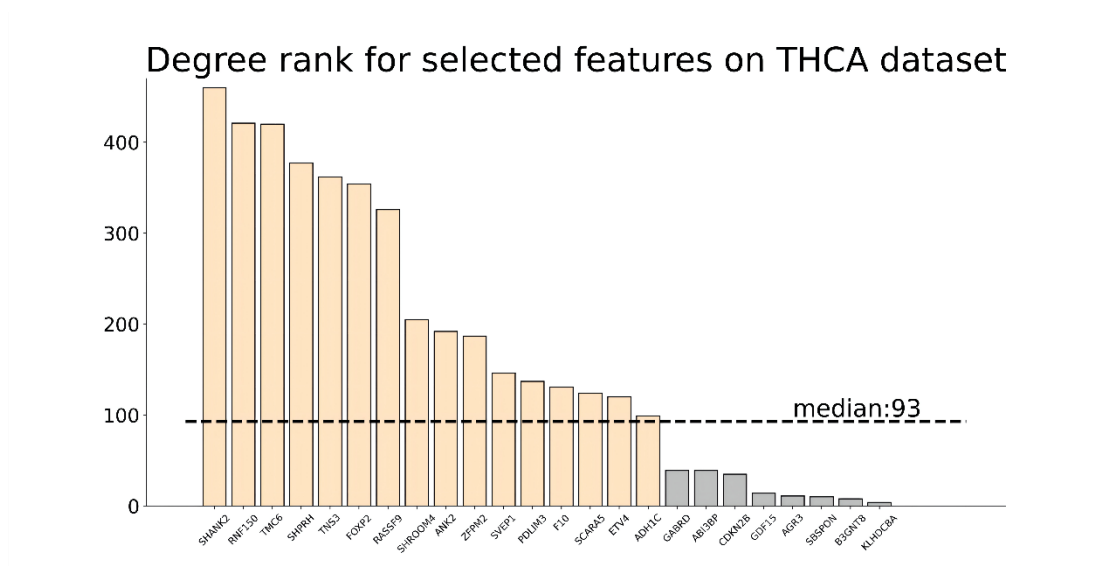

**Figure S7.** The degree of the features selected by EGFAFS for THCA dataset in the differential co-expression network.

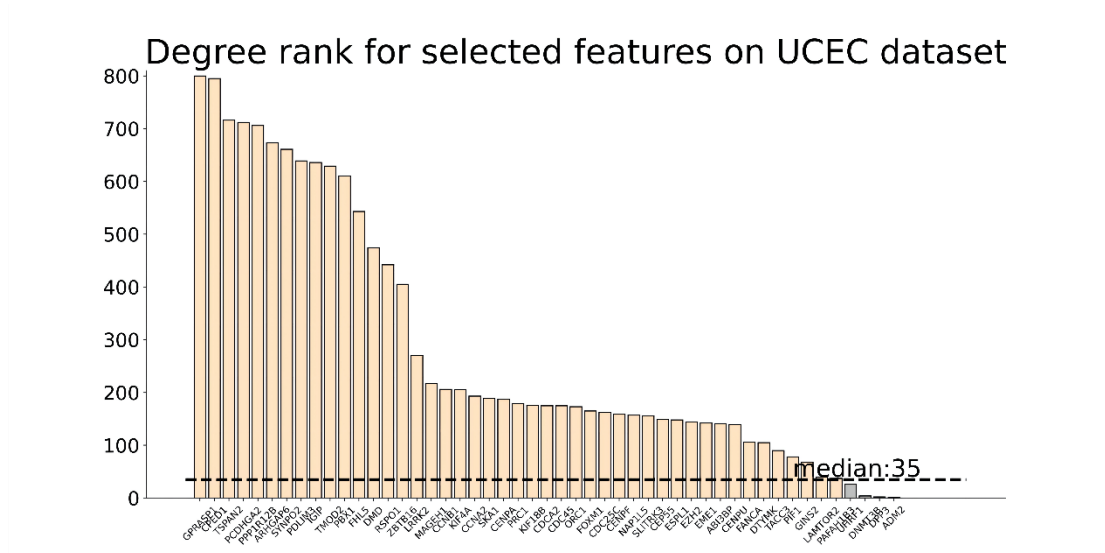

Figure S9-S16 show the results of GO enrichment on eight datasets (HNSC, LIHC, LUAD, LUSC, PRAD, STAD, THCA, and UCEC) with three aspects (BP, CC, and MF).

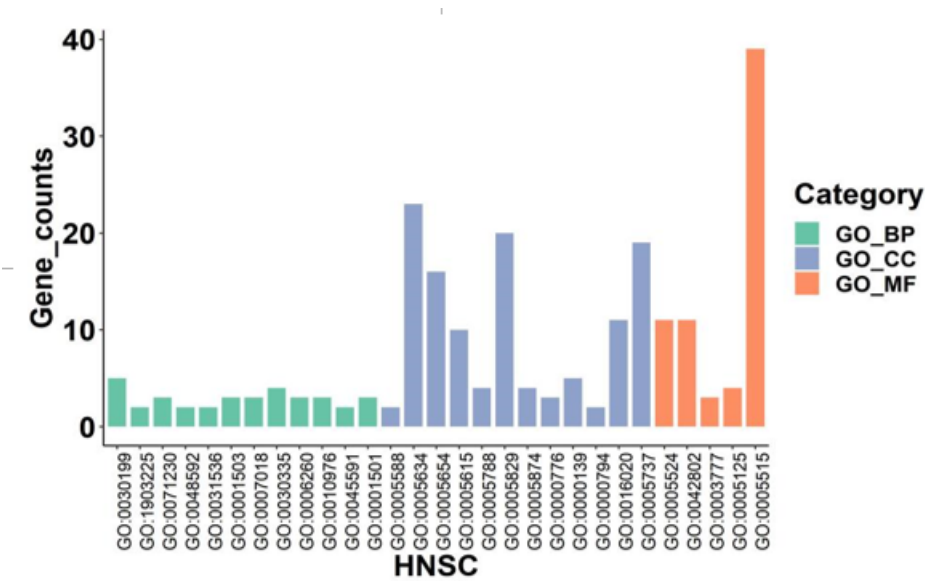

Figure S9. GO enrichment analysis of genes selected by EGFAFS on LIHC dataset.

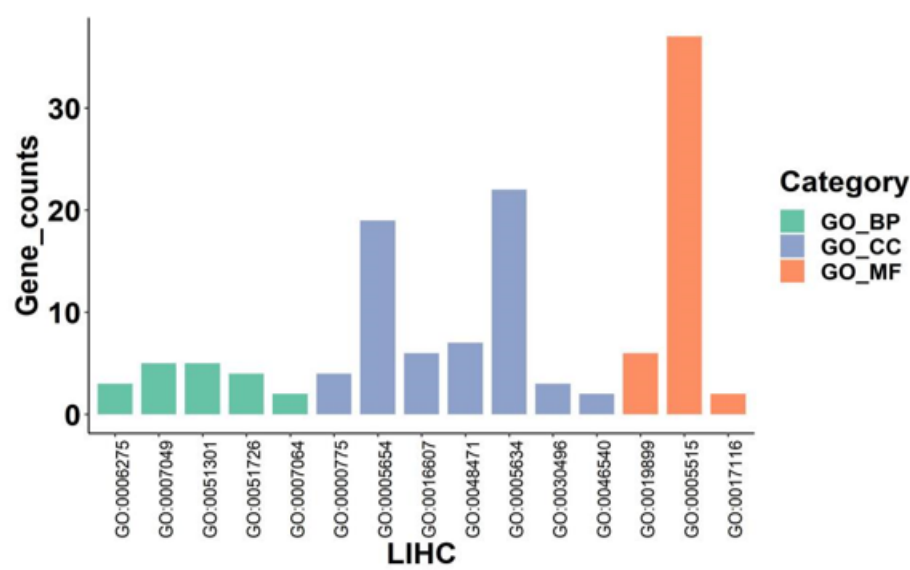

Figure S10. GO enrichment analysis of genes selected by EGFAFS on LIHC dataset.

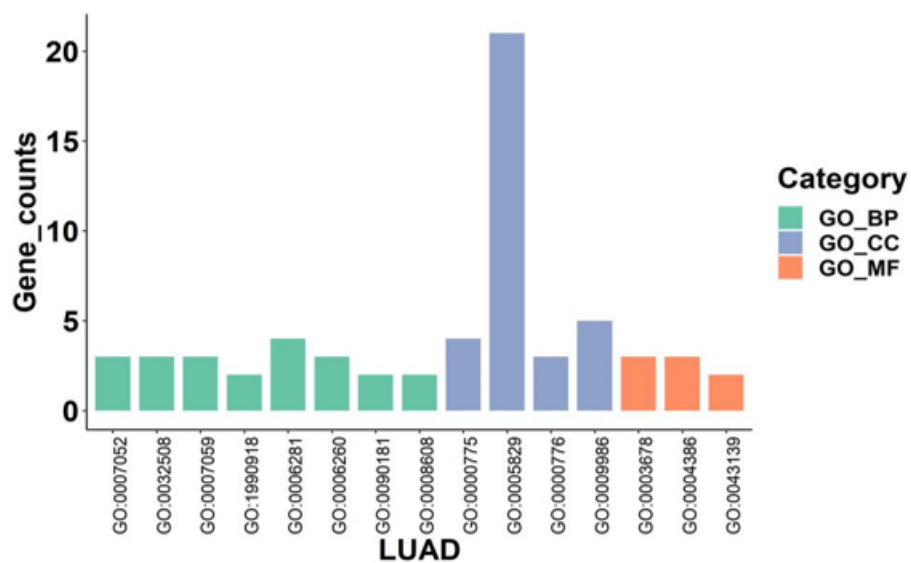

Figure S11. GO enrichment analysis of genes selected by EGFAFS on LUAD dataset.

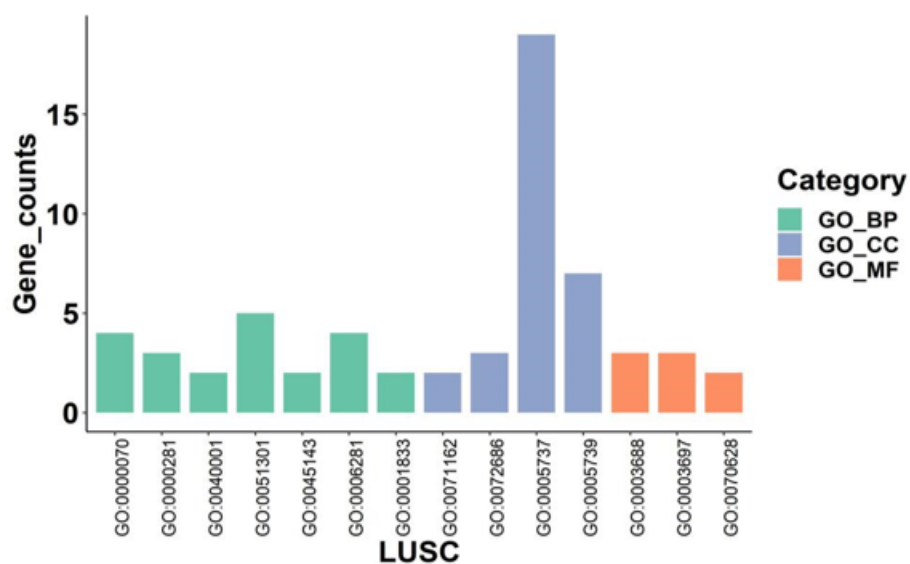

Figure S12. GO enrichment analysis of genes selected by EGFAFS on LUSC dataset.

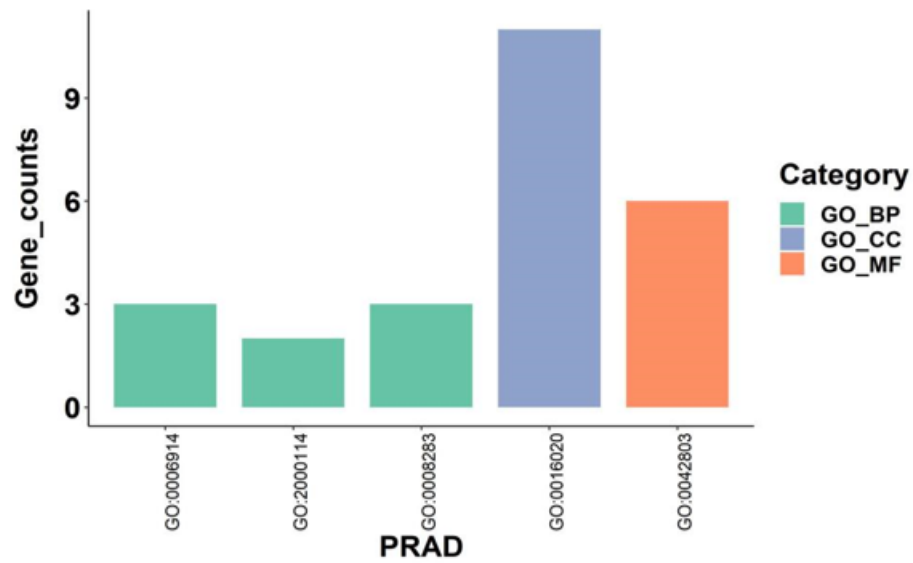

Figure S13. GO enrichment analysis of genes selected by EGFAFS on PRAD dataset.

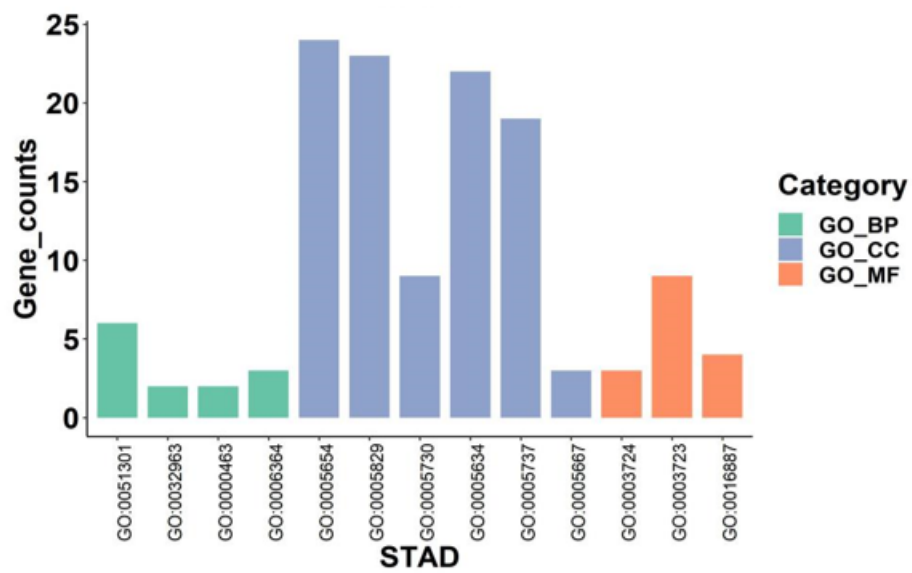

Figure S14. GO enrichment analysis of genes selected by EGFAFS on STAD dataset.

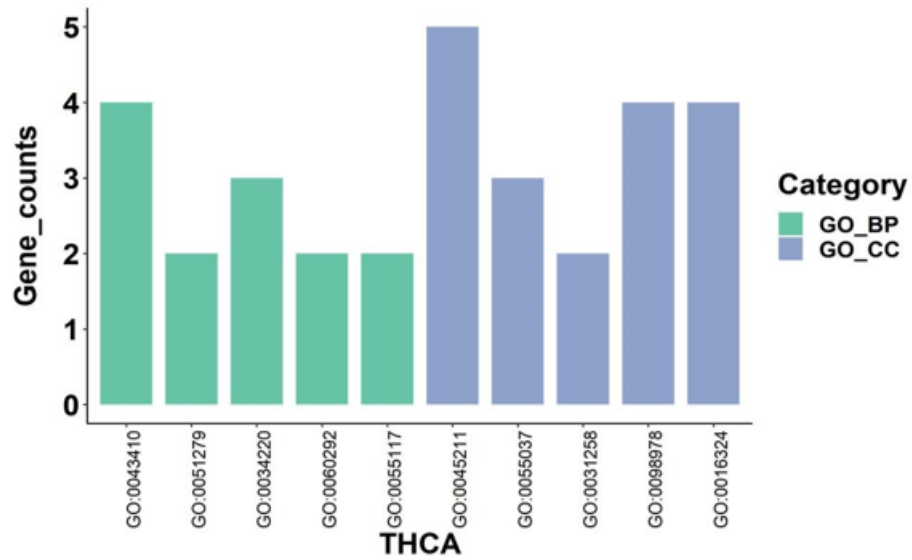

Figure S15. GO enrichment analysis of genes selected by EGFAFS on THCA dataset.

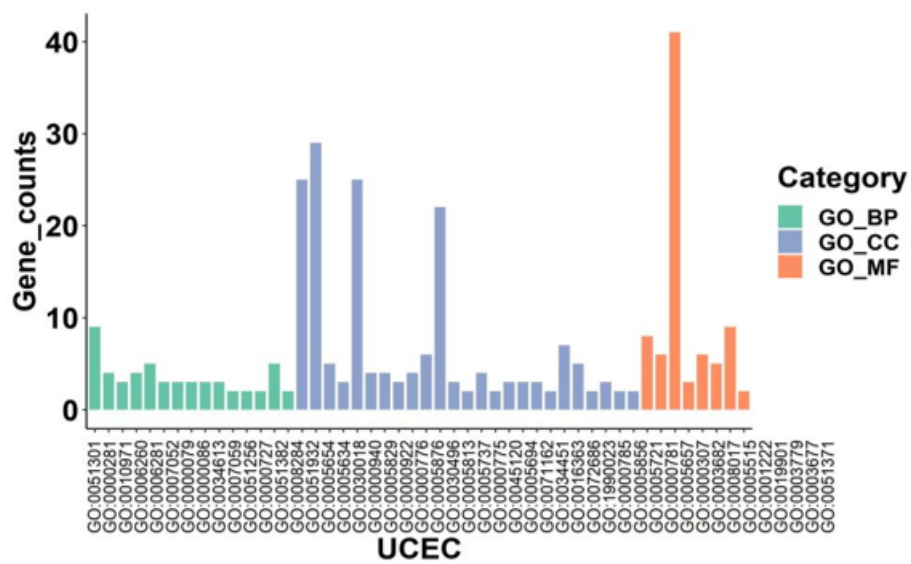

Figure S16. GO enrichment analysis of genes selected by EGFAFS on UCEC dataset.
